# Supplementary material
Source: HighWire-hosted journal article supplement (https://jmg.bmj.com/content/jmedgenet-2018-105834)
Supplement: inline-supplementary-material-3 [file inline-supplementary-material-3.xlsx]

## Sheet: Supplemental Table 2
Supplemental Table 2. Lower-confidence PALB2 alternative splicing events
Alternative Splicing Event Description		splicing sites3	GENCODE annotated?4	Biotype5	Functional Annotation5	targeted RNAseq6	whole-transcriptome RNAseq6		targeted RNAseq7	RT-PCR/CE7	Detection in different tissues
HGVS1	Simplified Description2					% of reference signal (Laboratory 1)	% of reference signal (Laboratory 2)	% of reference signal (Laboratory 3)	Laboratory 1. positive samples (N=71)	Laboratory 4. positive samples	Blood	Breast	Ovary
r.48_49ins48+1_48+449	▼(E1q449)	consensus	no	donor shift	PTC-NMD	0.32	not detected	not detected	0.59	not tested (out of range)	yes	yes	no
r.48_49ins48+1_48+1861	▼(E1q1861)	consensus	no	donor shift	PTC-NMD	0.07	not detected	not detected	0.19	not tested (out of range)	yes	yes	no
r.48_49ins48+1_48+2180	▼(E1q2180)	consensus	no	donor shift	PTC-NMD	0.07	not detected	not detected	0.25	not tested (out of range)	yes	yes	no
r.48_49ins48+1_48+2637	▼(E1q2637)	consensus	no	donor shift	PTC-NMD	0.24	not detected	not detected	0.25	not tested (out of range)	yes	no	no
r.48_49ins48+1_48+2651	▼(E1q2651)	consensus	no	donor shift	PTC-NMD	0.04	not detected	not detected	0.12	not tested (out of range)	yes	no	no
r.48_49ins48+1_48+2651+r.49_108del	▼(E1q2651)+Δ(E2)	consensus	no	donor shift	PTC-NMD	0.03	not detected	not detected	0.11	not tested (out of range)	yes	no	no
r.48_49ins48+1_48+2651+r.49_2514del	▼(E1q2651)+Δ(E2_E5)	consensus	no	donor shift	PTC-NMD	0.06	not detected	not detected	0.1	not tested (out of range)	yes	yes	no
r.48_49ins48+614_48+2176	IVS1+614▼(1563)	consensus	no	cassette	PTC-NMD	0.32	0.62	not detected	0.64	not tested (out of range)	yes	yes	no
r.1_28delins28+805_28+858+r.48_49ins49-463_49-330	▼(AFE600)+D(E1)+IVS1-463▼(134)	consensus	no	mixed	PTC-NMD	not detected	not detected	0.62	not detected	not tested (no proper primers)	yes	no	no
r.48_49ins49-463_49-330+r.49_54del	IVS1-463▼(134)+D(2p6)	consensus	no	mixed	PTC-NMD	not detected	not detected	not detected	not detected	8% (N=37)	yes	no	no
r.48_49ins49-2633_49-1	▼(E2p2633)	consensus	no	acceptor shift	PTC-NMD	0.02	not detected	not detected	0.15	not tested (out of range)	yes	no	no
r.48_49ins49-2335_49-1	▼(E2p2335)	consensus	no	acceptor shift	PTC-NMD	0.01	not detected	not detected	0.1	not tested (out of range)	yes	no	no
r.48_49ins49-1239_49-1	▼(E2p1239)	consensus	no	acceptor shift	PTC-NMD	0.03	not detected	not detected	0.12	not tested (out of range)	yes	no	no
r.48_49ins49-1236_49-1	▼(E2p1236)	consensus	no	acceptor shift	PTC-NMD	0.04	not detected	not detected	0.12	not tested (out of range)	yes	no	no
r.48_49ins49-1092_49-1	▼(E2p1092)	consensus	no	acceptor shift	PTC-NMD	0.01	not detected	not detected	0.1	not tested (out of range)	yes	no	no
r.48_49ins49-855_49-1	▼(E2p855)	consensus	no	acceptor shift	PTC-NMD	0.01	not detected	not detected	0.08	not tested (out of range)	yes	no	no
r.49_50del	Δ(E2p2)	(GT/TT)	no	acceptor shift	PTC-NMD	0.02	not detected	not detected	0.51	not detected (N=80)	yes	yes	no
r.49_1684del	Δ(E2_E4)	consensus	no	cassette	PTC-NMD	0.05	not detected	not detected	0.08	not detected (N=8)	yes	yes	no
r.49_2514del	D(E2_E5)	consensus	no	multi-cassette	No FS	0.43	not detected	3.09	0.84	not detected (N=38)	yes	yes	no
r.49_2586del	Δ(E2_E6)	consensus	no	cassette	No FS	0.04	not detected	not detected	0.27	not detected (N=8)	yes	yes	no
r.49_3113del	Δ(E2_E10)	consensus	no	cassette	PTC-NMD	0.02	not detected	not detected	0.14	not detected (N=8)	yes	no	no
r.109_2514del	Δ(E3_E5)	consensus	no	cassette	No FS	0.01	not detected	not detected	0.12	not detected (N=30)	yes	no	no
r.211_212ins212+1_212+901	▼(E3q901)	consensus	no	donor shift	PTC-NMD	0.02	not detected	not detected	0.1	not tested (out of range)	yes	yes	no
r.211_212ins212-1356_212-1	▼(E4p1365)	consensus	no	acceptor shift	PTC-NMD	0.07	not detected	not detected	0.14	not tested (out of range)	yes	no	no
r.1684_1685ins1684+1_1684+1707	▼(E4q1707)	consensus	no	donor shift	PTC-NMD	0.02	not detected	not detected	0.07	not tested (out of range)	yes	no	no
r.1684_1685ins1684+1_1684+2722	▼(E4q2722)	consensus	no	donor shift	PTC-NMD	0.23	not detected	not detected	0.41	not tested (out of range)	yes	yes	no
r.212_1708del	Δ(E4_E5p24)	consensus	no	mixed	No FS	not detected	not detected	not detected	not detected	6% (N=17)	no	yes	no
r.1684_1685ins1685-1810_1685-1	▼(E5p1810)	consensus	no	acceptor shift	PTC-NMD	0.06	not detected	not detected	0.16	not tested (out of range)	yes	no	no
r.1684_1685ins1685-1807_1685-1	▼(E5p1807)	consensus	no	acceptor shift	PTC-NMD	0.03	not detected	not detected	0.11	not tested (out of range)	yes	no	no
r.1685_2194del	Δ(E5p510)	consensus	no	acceptor shift	No FS	0.06	not detected	not detected	0.05	not tested (out of range)	yes	yes	no
r.2748_2749ins2749-224_2749-1	▼(E8p224)	consensus	no	acceptor shift	PTC-NMD	not detected	not detected	0.09	not detected	not detected (N=15)	yes	no	no
r.2834-2835ins2835-8_2835-1	▼(E9p8)	(GT/TT)	no	acceptor shift	PTC-NMD	0.03	not detected	not detected	0.32	not detected (N=34)	yes	yes	no
r.2835_3201del	Δ(E9_E11)	consensus	no	cassette	PTC-NMD	0.01	not detected	not detected	0.05	not detected (N=8)	yes	no	no
r.2835_3350del	Δ(E9_E12)	consensus	no	cassette	No FS	0.01	not detected	not detected	0.16	not detected (N=8)	yes	no	no
r.3083_3113del+r.3113_3114ins3114-23_3114-1	Δ(E10q31)+▼(E11p23)	consensus	no	mixed	PTC-NMD	not detected	not detected	not detected	not detected	94% (N=32)	yes	yes	yes
r.3113_3114ins3113+1_3113+2690	▼(E10q2690)	(CT/AG)	no	acceptor shift	PTC-NMD	0.07	not detected	not detected	0.49	not tested (out of range)	yes	no	no
r.3113_3114ins3113+1_3113+2775	▼(E10q2775)	consensus	no	donor shift	PTC-NMD	0.04	not detected	not detected	0.27	not tested (out of range)	yes	yes	no
r.3113_3114ins3114-2280_3114-1	▼(E11p2280)	consensus	no	acceptor shift	PTC-NMD	0.02	not detected	not detected	0.19	not tested (out of range)	yes	no	no
r.3113_3114ins3114-401_3114-1	▼(E11p401)	consensus	no	acceptor shift	PTC-NMD	0.10	not detected	0.11	0.16	not detected (N=17)	yes	yes	no
r.3201_3202ins3202-446_3202-1	▼(E12p446)	consensus	no	acceptor shift	PTC-NMD	0.01	not detected	not detected	0.05	not tested (out of range)	yes	yes	no
r.3201_3202ins3202-34_3202-1	▼(E12p34)	consensus	no	acceptor shift	PTC-NMD	0.03	not detected	not detected	0.1	not detected (N=41)	yes	no	no
r.3350_3351ins3350+1_3350+3937	▼(E13p3937)	consensus	no	acceptor shift	PTC-NMD	0.01	not detected	not detected	0.16	not tested (out of range)	yes	yes	no
Naturally occurring read-through transcription linking PALB2 exon 12 with NDUFAB1 exon 2		consensus	no	not-applicable	not-applicable	not detected	not detected	2.34	not detected	not tested (no proper primers)	yes	no	no
Naturally occurring read-through transcription linking an alternative donor shift in PALB2 exon 13 (D13q416) with NDUFAB1 exon 2		consensus	no	not-applicable	not-applicable	not detected	not detected	3.35	not detected	not tested (no proper primers)	yes	no	no
1 Alternative splicing described according to the Human Genome Variation Society guidelines (http://varnomen.hgvs.org/), using Ensembl transcript ENST00000261584.8 as references. 2 See Supplemental Material Section 2.1 and Supplemental Figure 2 for details. 3Consensus (GT/AG). 4 GENCODE information retrieved through Ensembl (https://www.ensembl.org) Last accesed 21/06/2018. 5 Biotype and Funciona…
