# Supplementary material
Source: HighWire-hosted journal article supplement (https://jmg.bmj.com/content/jmedgenet-2018-105834)
Supplement: inline-supplementary-material-4 [file inline-supplementary-material-4.xlsx]

## Sheet: Supplemental Table 3
Supplemental Table 3. RT-PCR/CE detection of PALB2 alternative splicing events.
Simplified Description1	PCR primer (fw)		PCR primer (rev)		predicted size of RT-PCR product (= ref nt ± insertion/deletion)	predicted peak detected?
	ID	seq (5'-3')	ID	FAM-seq (5'-3')
D(E1q169)	Exon1	GTCAGCTGATCGCGCACT	Exon3	GAGTGTTTTAGCTGCGGTGA	183 (352-169)	yes
D(E1q17)	Exon1	GTCAGCTGATCGCGCACT	Exon3	GAGTGTTTTAGCTGCGGTGA	335 (352-17)	yes
▼(E1q9)	Exon1bis	GCTCCCCATTCCTTCCTG	Exon3	GAGTGTTTTAGCTGCGGTGA	325 (316+9)	yes
▼(E1q337)	Exon1bis	GCTCCCCATTCCTTCCTG	Exon2	CGGGCTAGTGTCTTGCTGTA	547 (210+337)	yes
IVS1-463▼(134)	Exon1	GTCAGCTGATCGCGCACT	Exon3	GAGTGTTTTAGCTGCGGTGA	486 (352+134)	yes
▼(E1B134)+D(E2p6)	Exon1	GTCAGCTGATCGCGCACT	Exon3	GAGTGTTTTAGCTGCGGTGA	480 (352+134-6)	yes
▼(E2p26)	Exon1bis	GCTCCCCATTCCTTCCTG	Exon2	CGGGCTAGTGTCTTGCTGTA	236 (210+26)	yes
Δ(E2p2)	Exon1bis	GCTCCCCATTCCTTCCTG	Exon2	CGGGCTAGTGTCTTGCTGTA	208 (210-2)	no
Δ(E2p2)	Exon1	GTCAGCTGATCGCGCACT	Exon3	GAGTGTTTTAGCTGCGGTGA	350 (352-2)	no
D(E2p6)	Exon1	GTCAGCTGATCGCGCACT	Exon3	GAGTGTTTTAGCTGCGGTGA	343 (352-6)	yes
D(E2)	Exon1	GTCAGCTGATCGCGCACT	Exon3	GAGTGTTTTAGCTGCGGTGA	292 (352-60)	yes
Δ(E2_E4)	Exon1	GTCAGCTGATCGCGCACT	Exon5(5')	ATGAAATGGAGCCGTGAAAG	286 (1922-1636)	no
D(E2-E5)	Exon1	GTCAGCTGATCGCGCACT	Exon6	GGTTGCCTGGGTTTATGCTA	241 (2706-2466)	no
D(E2-E5)	Exon1	GTCAGCTGATCGCGCACT	Exon7	AAGCATCCAGAGCTTTCCAA	387 (2853-2466)	no
Δ(E2-E6)	Exon1	GTCAGCTGATCGCGCACT	Exon7	AAGCATCCAGAGCTTTCCAA	315 (2853-2538)	no
Δ(E2-E10)	Exon1	GTCAGCTGATCGCGCACT	Exon11	CTTTGTGACAGACTGAAGC	265 (3330-3065)	no
Δ(E2-E10)	Exon1bis	GCTCCCCATTCCTTCCTG	Exon11	CTTTGTGACAGACTGAAGC	231 (3296-3065)	no
▼(I2)	Exon1	GTCAGCTGATCGCGCACT	Exon3	GAGTGTTTTAGCTGCGGTGA	469 (352+117)	yes
▼(E3p36)	Exon1	GTCAGCTGATCGCGCACT	Exon3	GAGTGTTTTAGCTGCGGTGA	388 (352+36)	yes
▼(E3p36)	Exon2	AAATTAGCATTCTTGAAAAGGGAAT	Exon3	GAGTGTTTTAGCTGCGGTGA	185 (149+36)	yes
▼(E3p36)	Exon2	AAATTAGCATTCTTGAAAAGGGAAT	Exon4	AGCTTCTGCTTTTGCTCACC	407 (371+36)	yes
Δ(E3_E5)	Exon1	GTCAGCTGATCGCGCACT	Exon6	GGTTGCCTGGGTTTATGCTA	300 (2706-2406)	no
▼(E4p25)	Exon2	AAATTAGCATTCTTGAAAAGGGAAT	Exon4	AGCTTCTGCTTTTGCTCACC	396 (371+25)	yes
Δ(E4)	Exon3	CGTGCCCAAAGAGCTGAA	Exon5	AAAGGGCTCCACTGGTTTTT	333 (1806-1473)	yes
Δ(E4_E5p24)	Exon3	CGTGCCCAAAGAGCTGAA	Exon5	AAAGGGCTCCACTGGTTTTT	309 (1806-1473-24)	no
D(E4_E5)	Exon3	CGTGCCCAAAGAGCTGAA	Exon6	GGTTGCCTGGGTTTATGCTA	152 (2455-2303)	yes
Δ(E5p24)	Exon4	GCACAGGACAACCAAGTTCA	Exon5	AAAGGGCTCCACTGGTTTTT	485 (509-24)	yes
Δ(E5p24)	Exon4(3')	TCCAAGGAAGAAGTCACCTCA	Exon5(5')	ATGAAATGGAGCCGTGAAAG	132 (156-24)132	yes
Δ(E5p139)	Exon4	GCACAGGACAACCAAGTTCA	Exon5	AAAGGGCTCCACTGGTTTTT	370 (509-139)	yes
D(E5)	Exon4	GCACAGGACAACCAAGTTCA	Exon6	GGTTGCCTGGGTTTATGCTA	328 (1158-830)	yes
▼(E6p28)	Exon5	GGACAACCTACCTGTGACTGTG	Exon8	TTCCCAAAGCTACACACACG	455 (427+28)	yes
D(E6)	Exon5	GGACAACCTACCTGTGACTGTG	Exon8	TTCCCAAAGCTACACACACG	355 (427-72)	yes
▼(E7p42)	Exon5	GGACAACCTACCTGTGACTGTG	Exon8	TTCCCAAAGCTACACACACG	469 (427+42)	yes
▼(E7p42)	Exon6	AGCAGAGCTTCCTGCTTCTG	Exon8	TTCCCAAAGCTACACACACG	332 (290+42)	yes
▼(E7p20)	Exon5	GGACAACCTACCTGTGACTGTG	Exon8	TTCCCAAAGCTACACACACG	447 (427+20)	yes
▼(E7p20)	Exon6	AGCAGAGCTTCCTGCTTCTG	Exon8	TTCCCAAAGCTACACACACG	310 (290+20)	yes
Δ(E7p2)	Exon6	AGCAGAGCTTCCTGCTTCTG	Exon8	TTCCCAAAGCTACACACACG	288 (290-2)	yes
D(E7p10)	Exon5	GGACAACCTACCTGTGACTGTG	Exon8	TTCCCAAAGCTACACACACG	417 (427-10)	yes
D(E7p25)	Exon5	GGACAACCTACCTGTGACTGTG	Exon8	TTCCCAAAGCTACACACACG	402 (427-25)	yes
D(E7)	Exon5	GGACAACCTACCTGTGACTGTG	Exon8	TTCCCAAAGCTACACACACG	265 (427-162)	yes
▼(E8p224)	Exon7	CCGGTTGTAAAGAGCCATGT	Exon8	TTCCCAAAGCTACACACACG	398 (174+224)	no
▼(E8p30)	Exon7	CCGGTTGTAAAGAGCCATGT	Exon8	TTCCCAAAGCTACACACACG	204 (174+30)	yes
Δ(E8)	Exon7	CCGGTTGTAAAGAGCCATGT	Exon10	AAGCAGAGCTTCTTGCATCC	357 (443-86)	yes
D(E8_E9)	Exon7	CCGGTTGTAAAGAGCCATGT	Exon11	CTTTGTGACAGACTGAAGC	301 (549-248)	yes
D(E8_E9)	Exon7	CCGGTTGTAAAGAGCCATGT	Exon10	AAGCAGAGCTTCTTGCATCC	195 (443-248)	yes
▼(E9p8)	Exon7	CCGGTTGTAAAGAGCCATGT	Exon10	AAGCAGAGCTTCTTGCATCC	451 (443+8)	no
D(E9p30)	Exon7	CCGGTTGTAAAGAGCCATGT	Exon10	AAGCAGAGCTTCTTGCATCC	413 (443-30)	yes
D(E9)	Exon7	CCGGTTGTAAAGAGCCATGT	Exon10	AAGCAGAGCTTCTTGCATCC	281 (443-162)	yes
D(E9)	Exon7	CCGGTTGTAAAGAGCCATGT	Exon11	CTTTGTGACAGACTGAAGC	387 (549-162)	yes
D(E9_E10)	Exon7	CCGGTTGTAAAGAGCCATGT	Exon11	CTTTGTGACAGACTGAAGC	270 (549-279)	yes
D(E9_E11)	Exon7	CCGGTTGTAAAGAGCCATGT	Exon13	ACCCGACCATTTCACAAAAG	493 (860-367)	no
D(E9_E12)	Exon7	CCGGTTGTAAAGAGCCATGT	Exon13	ACCCGACCATTTCACAAAAG	344 (860-516)	no
Δ(E10p2)	Exon9	GGCATTGTTTTGTTCCTCTGA	Exon10	AAGCAGAGCTTCTTGCATCC	245 (247-2)	yes
Δ(E10p3)	Exon9	GGCATTGTTTTGTTCCTCTGA	Exon10	AAGCAGAGCTTCTTGCATCC	244 (247-3)	yes
D(E10)	Exon9	GGCATTGTTTTGTTCCTCTGA	Exon12	TGCCCTGGAGGAAGACAGTA	390 (507-117)	yes
Δ(E10q31)	Exon10	ATTTTTGATGCCCCCTGAG	Exon11	CTTTGTGACAGACTGAAGC	145 (176-31)	yes
Δ(E10q31)+▼(E11p23)	Exon10	ATTTTTGATGCCCCCTGAG	Exon11	CTTTGTGACAGACTGAAGC	168 (176-31+23)	yes
▼(E11p401)	Exon10	ATTTTTGATGCCCCCTGAG	Exon11	CTTTGTGACAGACTGAAGC	577 (176+401)	no
▼(E11p23)	Exon10	ATTTTTGATGCCCCCTGAG	Exon11	CTTTGTGACAGACTGAAGC	199 (176+23)	yes
Δ(E11p2)	Exon10	ATTTTTGATGCCCCCTGAG	Exon11	CTTTGTGACAGACTGAAGC	174 (176-2)	yes
Δ(E11p2)	Exon10	ATTTTTGATGCCCCCTGAG	Exon12	TGCCCTGGAGGAAGACAGTA	328 (330-2)	yes
D(E11)	Exon10	ATTTTTGATGCCCCCTGAG	Exon13	ACCCGACCATTTCACAAAAG	399 (487-88)	yes
D(E11)	Exon9	GGCATTGTTTTGTTCCTCTGA	Exon12	TGCCCTGGAGGAAGACAGTA	419 (507-88)	yes
D(E11_E12)	Exon10	ATTTTTGATGCCCCCTGAG	Exon13	ACCCGACCATTTCACAAAAG	250 (487-237)	yes
Δ11+▼(E12p446)	Exon10	ATTTTTGATGCCCCCTGAG	Exon12	TGCCCTGGAGGAAGACAGTA	688 (330+446-88)	yes
D11+▼(E12p65)	Exon10	ATTTTTGATGCCCCCTGAG	Exon13	ACCCGACCATTTCACAAAAG	464 (487-88+65)	yes
▼(E12p65)	Exon10	ATTTTTGATGCCCCCTGAG	Exon13	ACCCGACCATTTCACAAAAG	552 (487+65)	yes
▼(E12p65)	Exon10	ATTTTTGATGCCCCCTGAG	Exon12	TGCCCTGGAGGAAGACAGTA	395 (330+65)	yes
Δ(E12p136)	Exon10	ATTTTTGATGCCCCCTGAG	Exon13	ACCCGACCATTTCACAAAAG	351 (487-136)	yes
▼(E12p34)	Exon10	ATTTTTGATGCCCCCTGAG	Exon12	TGCCCTGGAGGAAGACAGTA	364 (330+34)	no
D(E12)	Exon10	ATTTTTGATGCCCCCTGAG	Exon13	ACCCGACCATTTCACAAAAG	338 (487-149)	yes
1See Supplemental Material Section 2.1 and Supplemental Figure 2 for details.
